## **Corrigendum: *Water Supply* 20 (1), 28–45: Water quality monitoring: from conventional to emerging technologies, Umair Ahmed *et al.***

Umair Ahmed, Rafia Mumtaz, Hirra Anwar, Sadaf Mumtaz  
and Ali Mustafa Qamar

**Ali Mustafa Qamar**  
Department of Computer Science,  
College of Computer,  
Qassim University,  
Al-Mulaida 51431,  
Saudi Arabia

The authors regret that the second affiliation for Ali Mustafa Qamar was not referenced in their original paper and apologise for any inconvenience caused. The second affiliation for the author for this paper can be found above.
